# Supplementary material
Source: HighWire-hosted journal article supplement (https://rapm.bmj.com/highwire/filestream/21381/field_highwire_adjunct_files/1/rapm-2023-104480supp002_data_supplement.pdf)

### Importance of Neuromodulation Topics - Fellow Ranking

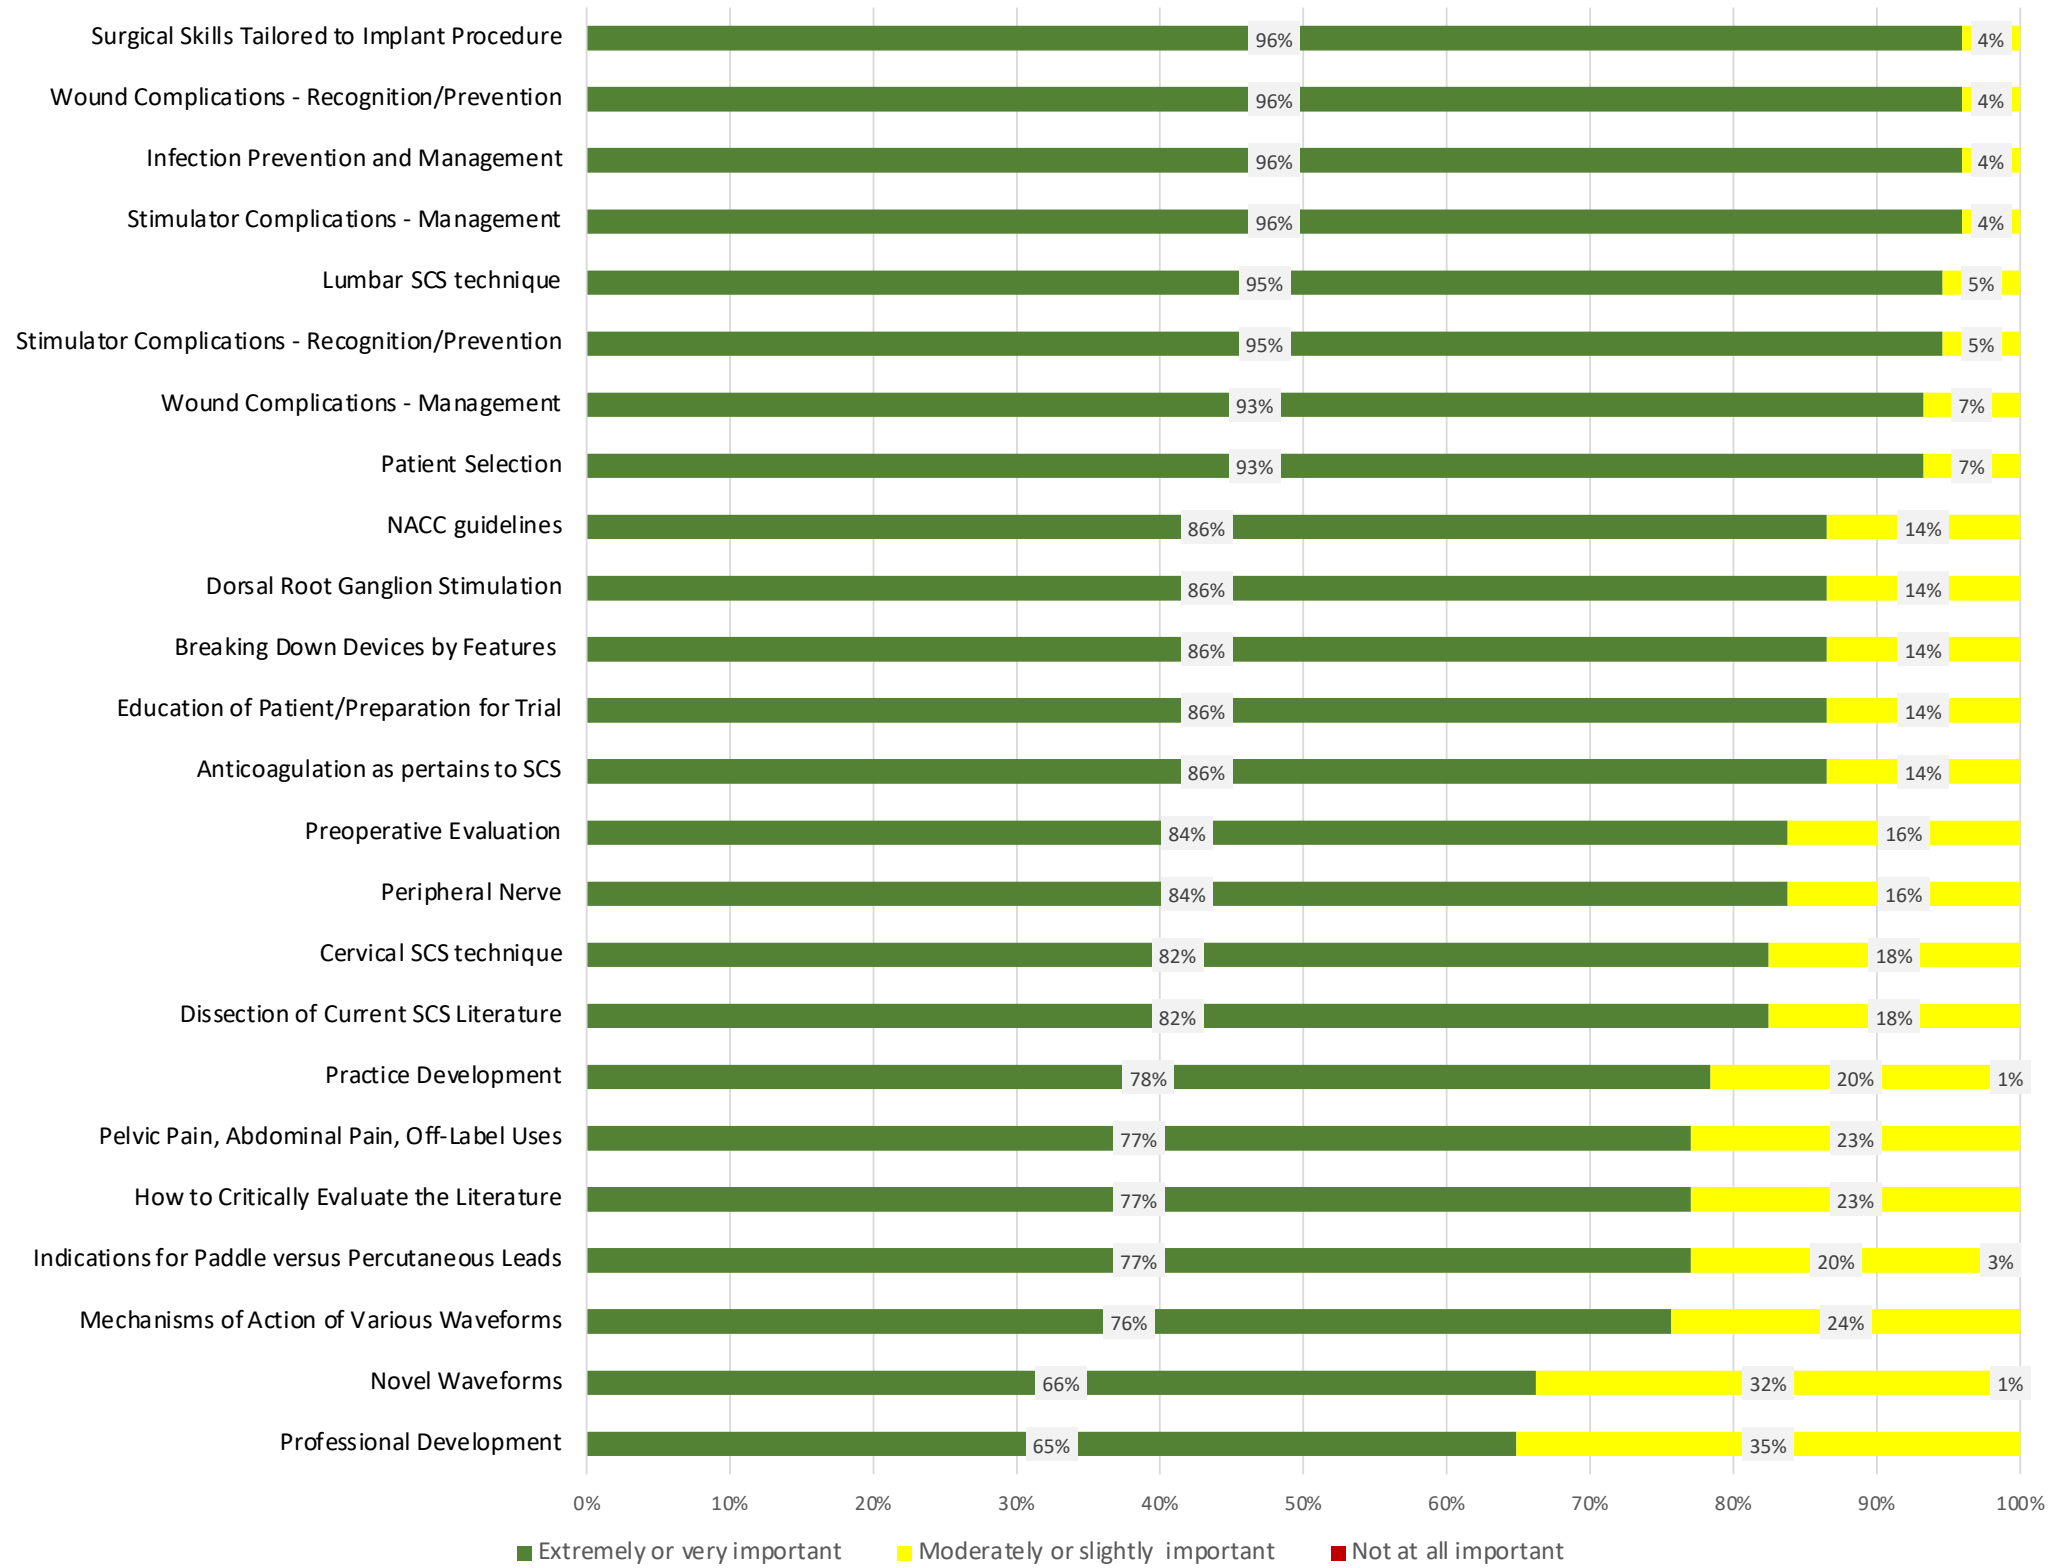

Supplement: rapm-2023-104480supp002_data_supplement.pdf [file rapm-2023-104480supp002_data_supplement.pdf]
